# Supplementary material for: Chiral azide-bridged two-dimensional Cu(ii) compounds showing a field-induced spin–flop transition
Source: Royal Society of Chemistry journal article supplement (doi:10.1039/b507051a), 2005-01-01
Supplement: b507051a.pdf [file b507051a.pdf]

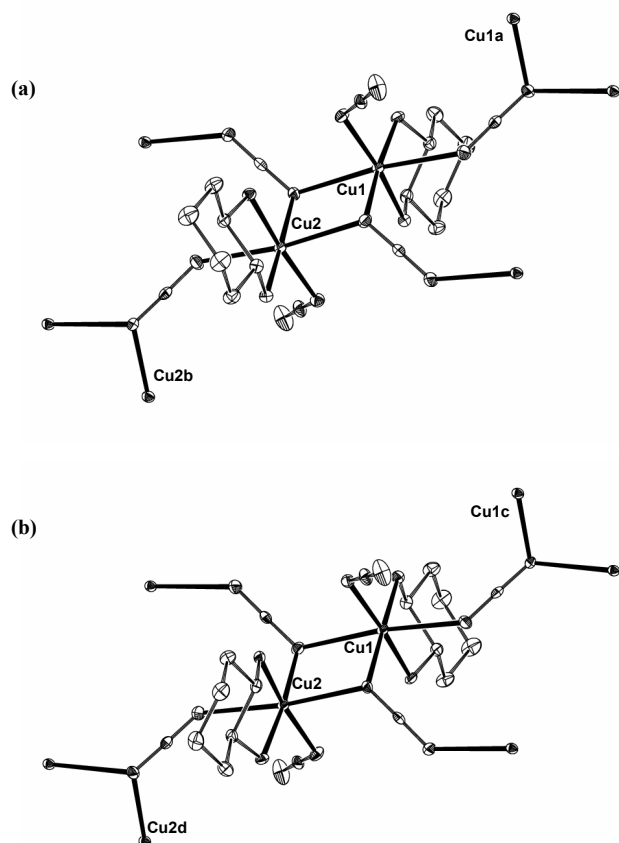

Figure S1. Molecular view of (a) **1** and (b) **2** showing the details of the co-ordination around Cu(II) ions.

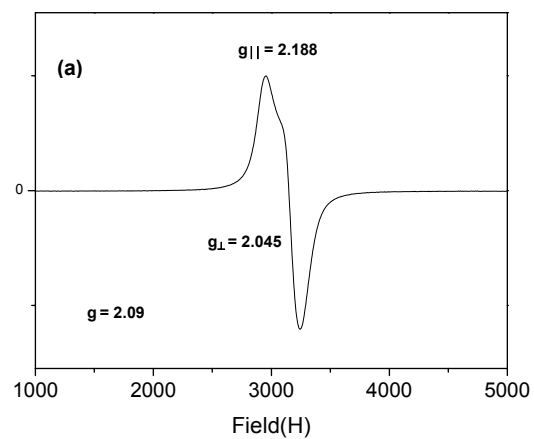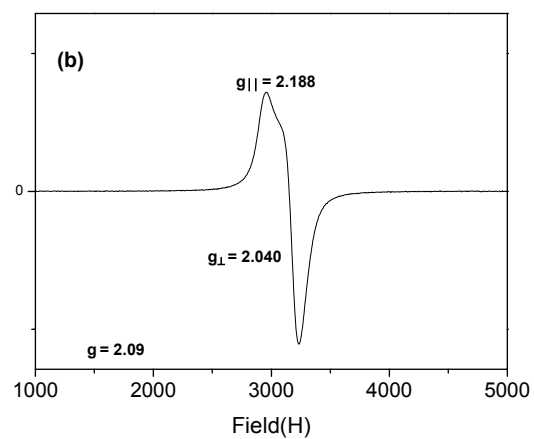

Figure S2. Room temperature EPR spectra of (a) **1** and (b) **2**. The g value is equal to 2.09 for both compounds.

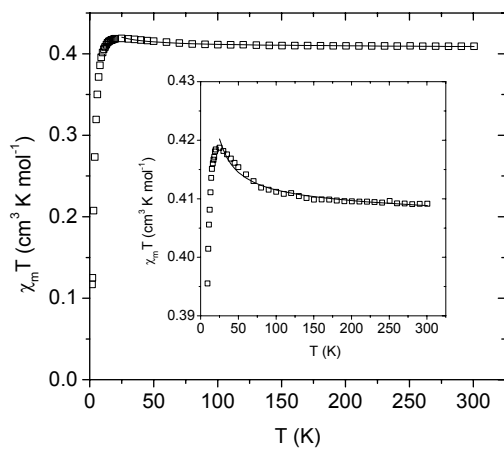

Figure S3. Plot of  $\chi_m T$  vs.  $T$  for **2** at a magnetic field of 1 T. The solid line shows the best theoretical fit based on an infinite chain model. The inset denotes the enlarged plot of  $\chi_m T$  vs.  $T$  for **2**.

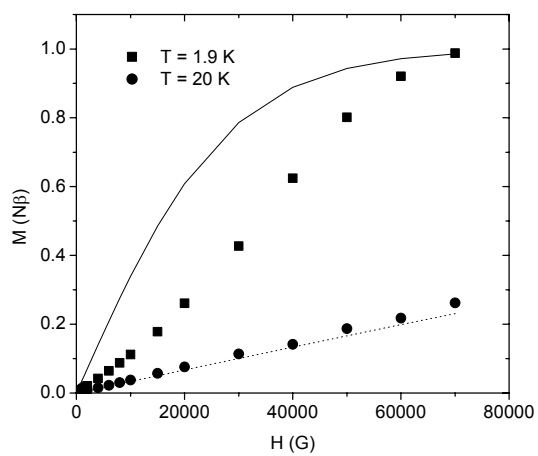

Figure S4. Field dependence of magnetization for **2**. The solid and dotted lines represent the Brillouin curves for a noninteracting Cu(II) ion at 1.9 and 20 K, respectively.

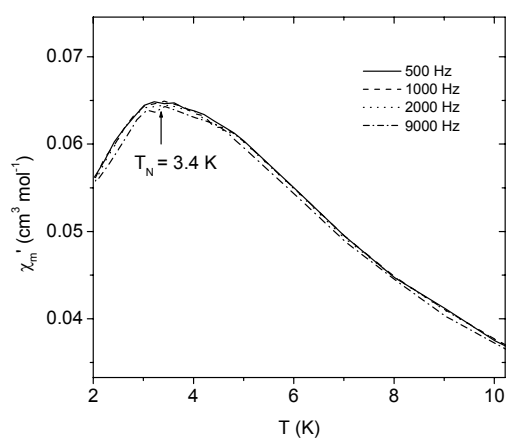

Figure S5. Temperature dependence of real component of ac susceptibility in zero applied static field with an oscillating field of 10 G at various frequencies for **1**. The arrow indicates the temperature of an antiferromagnetic ordering.

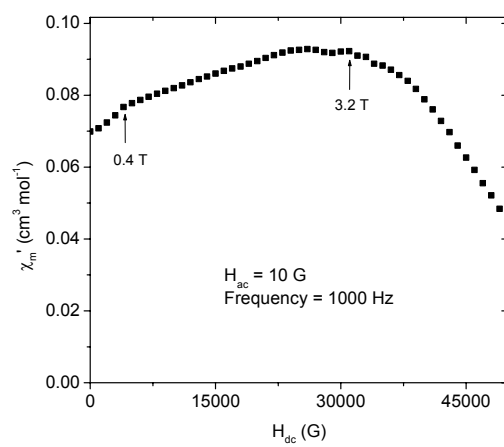

Figure S6. Field dependence of real component of ac susceptibility for **1** at 1.9 K.
